# Supplementary material for: Carbon-encapsulated highly dispersed FeMn nanoparticles for Fischer–Tropsch synthesis to light olefins
Source: Royal Society of Chemistry journal article supplement (doi:10.1039/c7nj04270a), 2018-01-01
Supplement: c7nj04270a1.pdf [file c7nj04270a1.pdf]

## SUPPORTING INFORMATION

### **Carbon-encapsulated highly dispersed FeMn nanoparticles for Fischer-Tropsch synthesis to light olefins**

Can Zhu <sup>a, b</sup>, Mingwei Zhang <sup>a</sup>, Chao Huang <sup>d</sup>, Liangshu Zhong <sup>c</sup>, Kegong Fang<sup>\*, a</sup>

<sup>a</sup> State Key Laboratory of Coal Conversion, Institute of Coal Chemistry, Chinese Academy of Sciences, Taiyuan  
030001, PR China

<sup>b</sup> University of Chinese academy of sciences Beijing 100039. China

<sup>c</sup> Shanghai Advance Research Institute, Chinese Academy of Sciences

<sup>d</sup> College of Environmental Engineering, Shanghai University, 333 Nanchen Road, Shanghai 200444, PR China

\* Corresponding author. E-mail: [kgfang@sxicc.ac.cn](mailto:kgfang@sxicc.ac.cn).

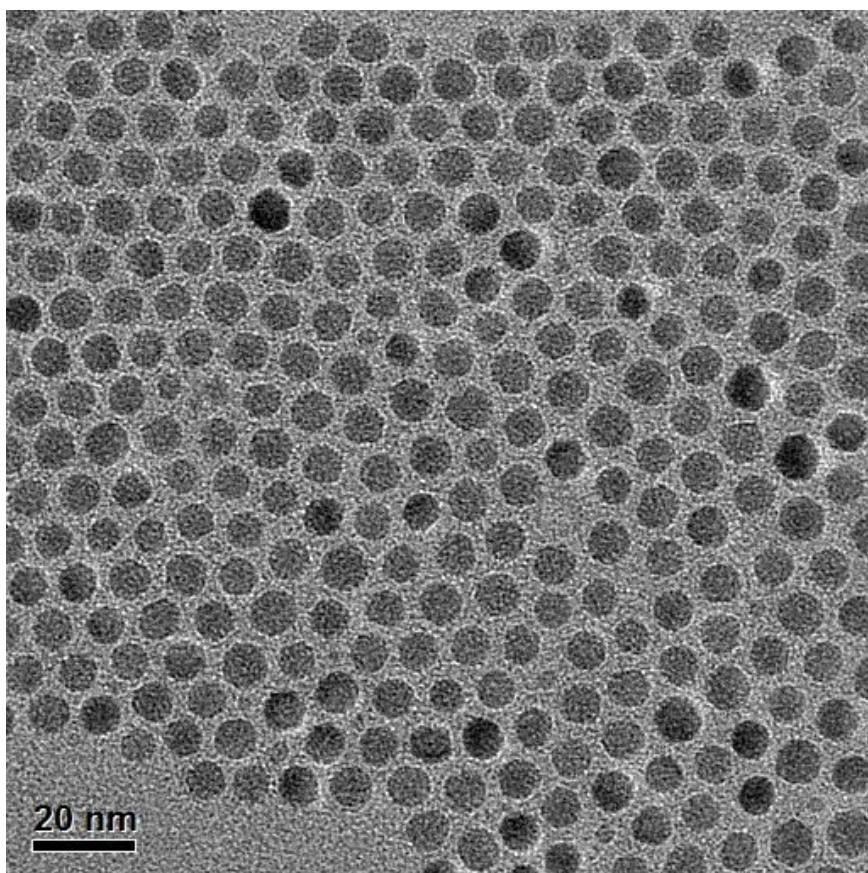

**Fig S1: TEM images of as-prepared oleic acid capped FeMn NPS**

$$\ln(W_n/n) = n \ln \alpha + \ln[(1 - \alpha)^2 / \alpha]$$

**Equation S1 Anderson-Schulz-Flory model for the product distribution**

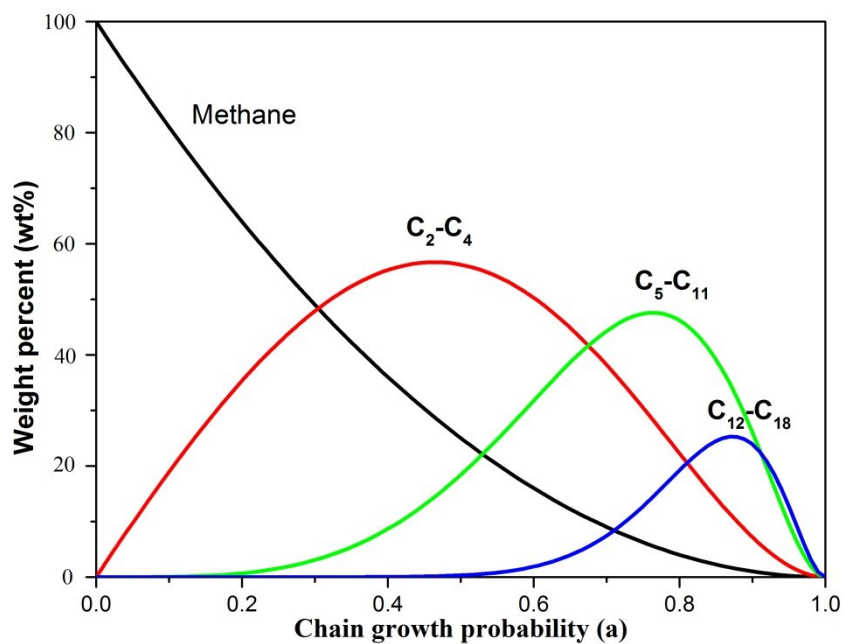

**Fig S2 Product distribution predicted by Anderson-Schulz-Flory (ASF) model.**

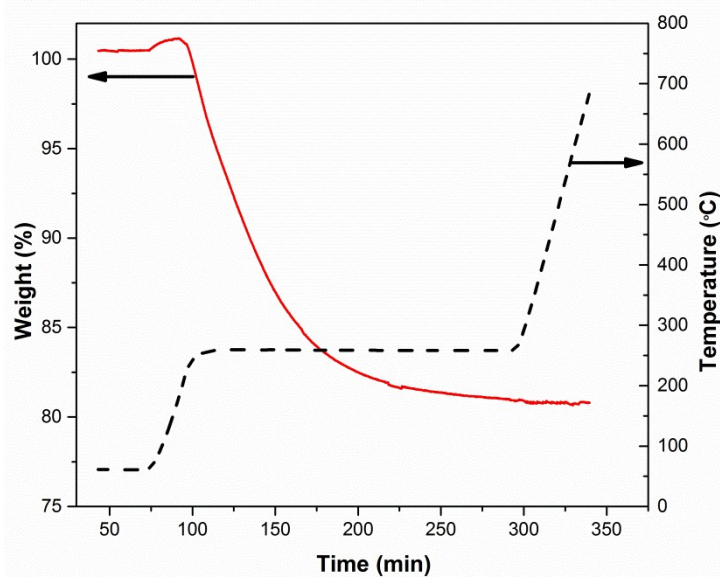

**Fig. S3 TGA of the as-synthesized oleic acid capped FeMn NPS**

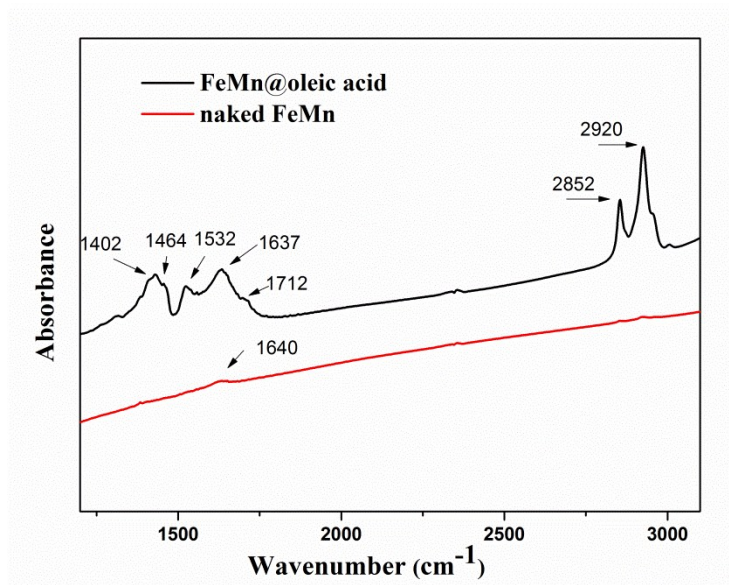

**Fig. S4 IR spectra of oleic acid stabilized FeMn NPS and naked FeMn NPS**

**Table S1 The main vibration mode of oleic acid**

| Peak (cm <sup>-1</sup> ) | Assignment <sup>a</sup>           |
|--------------------------|-----------------------------------|
| 2920                     | $\nu_a$ CH <sub>2</sub>           |
| 2852                     | $\nu_s$ CH <sub>2</sub>           |
| 1712                     | $\nu$ C=O                         |
| 1637                     | $\nu$ C=C                         |
| 1532                     | $\nu_a$ COO-                      |
| 1464                     | (sh) ( $\delta$ CH <sub>2</sub> ) |
| 1402                     | $\nu_s$ COO-                      |

<sup>a</sup> (sh) shoulder;  $\nu_a$  = asymmetric stretching;  $\nu_s$  = symmetric stretching;  $\delta$  = scissoring

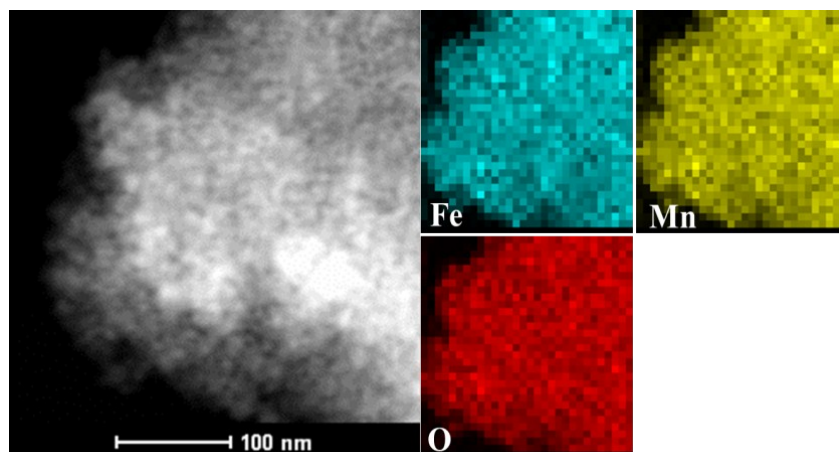

**Fig. S5 HAADF-STEM images and corresponding elemental mapping of Fe, Mn and O in the naked FeMn sample.**

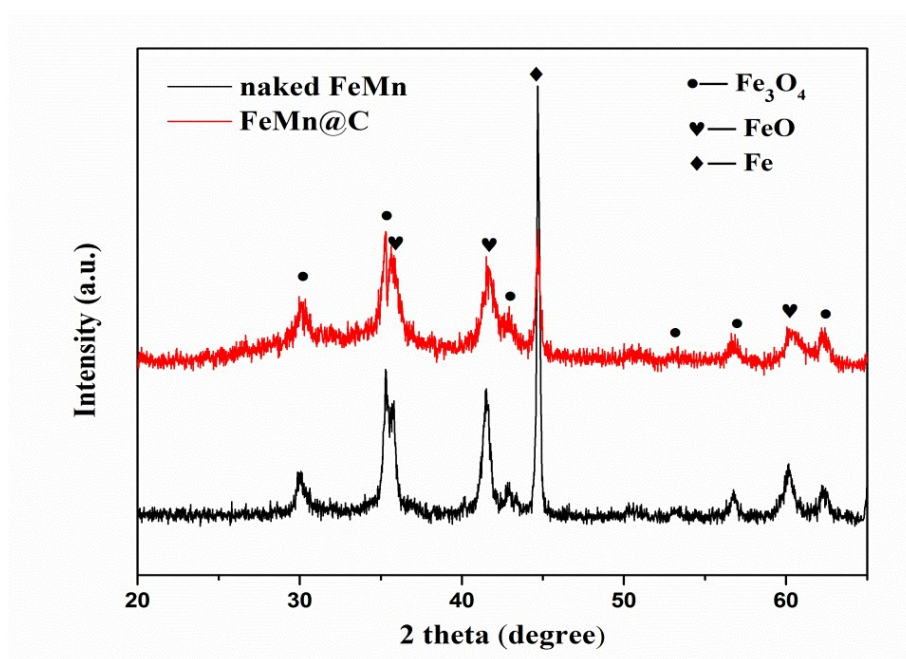

**Fig. S6 X-ray diffraction patterns of the reduced catalysts: FeMn@C and naked FeMn**

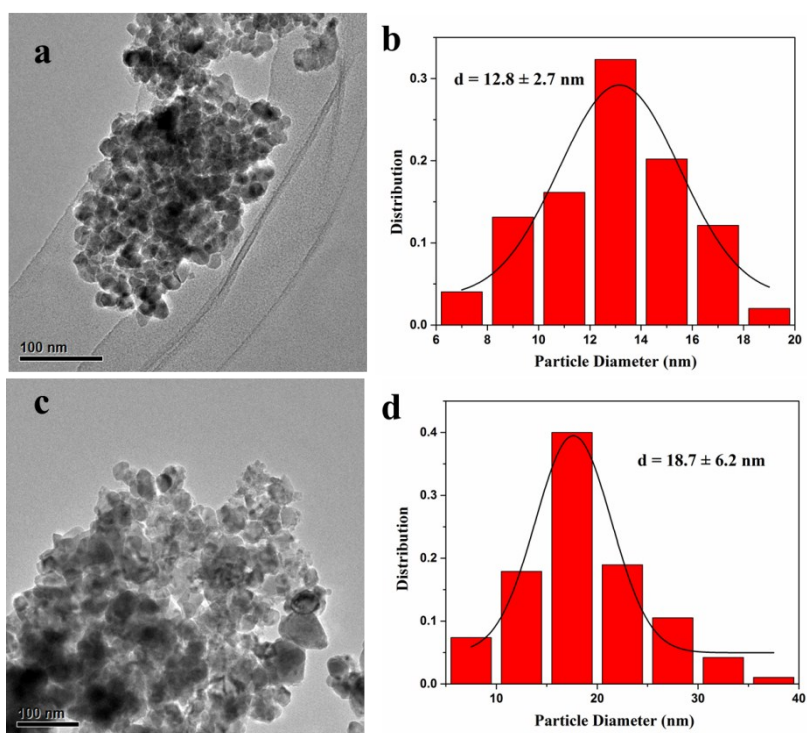

**Fig. S7 TEM images and Particles Size Distribution histograms with Gaussian analysis fitting of the reduced catalysts: FeMn@C (a, b) and naked FeMn (c, d).**
